# Longitudinal Association between Sex Hormone Levels, Bone Loss, and Bone Turnover in Elderly Men

LUIGI GENNARI, DANIELA MERLOTTI, GIUSEPPE MARTINI, STEFANO GONNELLI, BEATRICE FRANCI, STELLA CAMPAGNA, BARBARA LUCANI, NORBERTO DAL CANTO, ROBERTO VALENTI, CARLO GENNARI\*, AND RANUCCIO NUTI

Department of Internal Medicine, Endocrine-Metabolic Sciences and Biochemistry, University of Siena, 53100 Siena, Italy

Male osteoporosis is an increasingly important health problem. It is known that sex steroid hormones play an important role in regulating bone turnover and bone mass in males as well as in females. However, the exact mechanism of bone loss in men remains unknown. In the present study, 200 elderly men (age range, 55–85 yr) were followed for 4 yr to evaluate the relationships between hormone levels, bone turnover markers, bone mineral density, and rates of bone loss. Femoral and lumbar bone mineral density, bone ultrasound parameters at the os calcis, serum testosterone (T), serum estradiol ( $E_2$ ), SHBG levels, and bone turnover markers (urinary crosslaps and bone alkaline phosphatase) were evaluated for each man at enrollment and 4 yr afterward. The free androgen index (FAI) and free estrogen index (FEI) as well as measures of the bioavailable sex hormones [calculated bioavailable  $E_2$  (c-bio $E_2$ ) and T (c-bioT)] were calculated from total hormone levels and SHBG. In the total population, T, c-bioT, c-bio $E_2$ , FAI, and FEI, but not  $E_2$ , decreased significantly with age,

whereas SHBG increased significantly. Subjects with FEI, c-bio $E_2$ , and  $E_2$  levels below the median showed higher rates of bone loss at the lumbar spine and the femoral neck as well as higher speed-of-sounds decrease at the calcaneus with respect to men with FEI, c-bio $E_2$ , and  $E_2$  levels above the median. Serum bone alkaline phosphatase and urinary crosslaps were significantly higher in men with FEI, c-bio $E_2$ , and  $E_2$  in the lower quartile than in men with FEI, c-bio $E_2$ , and  $E_2$  levels in the higher quartile. No statistically significant differences were observed in relation to T, c-bioT, or FAI levels. Finally, the ratio between  $E_2$  and T, an indirect measure for aromatase activity, increased significantly with age and was higher in normal than in osteoporotic subjects. In conclusion, results from the present study indicate an important role of estrogens, and particularly of the ability to aromatize T to  $E_2$ , in the regulation of bone loss and bone metabolism in elderly men. (*J Clin Endocrinol Metab* 88: 5327–5333, 2003)

RECENT EPIDEMIOLOGICAL STUDIES pointed out that male osteoporosis is an increasingly important health problem. A 50-yr-old man has about a 6% risk of hip fracture and a 16–25% risk of any osteoporotic fracture in his remaining life (1). Although the exact incidence and gender ratio varies from country to country, it has been estimated that about one third of all fractures occur in men (2, 3). With the increase in life expectancy, the number of elderly men will increase dramatically in the years to come, and the number of fractures in men is expected to double by 2025 (4). Moreover, the mortality rate after hip fracture is even higher in men than in women (5).

Despite the considerable public health burden attributable to male osteoporotic fractures, the exact mechanism regulating bone mass and bone loss in men remains unknown. Several hormonal and biochemical factors known to affect bone metabolism in women have been shown to change with age in men and have been supposed to influence the age-related decline of bone mineral density (BMD) also in males (6–9). Evidence from

cross-sectional studies suggested that declining levels of sex hormones, IGF-I, and 25-OH vitamin D, together with a parallel increase in SHBG and PTH may contribute to age-related bone loss in elderly men (9, 10). In particular, several clinical and experimental observations indicated estrogen as the dominant sex steroid regulating bone metabolism in men (11), and in cross-sectional analysis, estradiol ( $E_2$ ) levels appeared to correlate better with BMD than circulating testosterone (T) (12–17). However, evidence from longitudinal studies is scarce. In a preliminary observation for an average of 2.1 yr, Slemenda *et al.* (12) described lower  $E_2$  levels in men losing BMD at more than 1% per year than in those losing BMD at less than 1% per year. In a more recent 4-yr study by Khosla *et al.* (18), elderly men with bioavailable  $E_2$  levels below the median value of 40 pmol/liter showed higher rates of bone loss at the midradius and -ulna than men with bioavailable  $E_2$  levels above the median. Other additional longitudinal studies in larger and ethnically different male populations are needed to further address this issue.

The aim of this study was to longitudinally evaluate the biological interactions among sex hormones, SHBG, and dehydroepiandrosterone sulfate (DHEAS), as well as their role in the regulation of bone turnover and bone loss in a sample of elderly Italian men.

## Subjects and Methods

### Subjects

Patients eligible for the study were 500 elderly men living in the area of Siena, Italy, contacted by direct mailing, with an age greater than 55

Abbreviations: aBMD, Areal bone mineral density; ANCOVA, analysis of covariance; BALP, bone alkaline phosphatase; BMD, bone mineral density; BMI, body mass index; BUA, broadband ultrasound attenuation; c-bio $E_2$ , calculated bioavailable estradiol; c-bioT, calculated bioavailable testosterone; c-f $E_2$ , calculated free estradiol; c-fT, calculated free testosterone; CTX, crosslaps; CV, coefficient of variation; DHEAS, dehydroepiandrosterone sulfate; DXA, dual-energy x-ray absorptiometry;  $E_2$ , estradiol; FAI, free androgen index; FEI, free estrogen index; QUS, quantitative ultrasound; T, testosterone; vBMAD, volumetric bone mineral apparent density.

\* We dedicate this work to the memory of C.G.

yr. Among them, 364 men (age range, between 55 and 85 yr) agreed to participate. From this total cohort of 364 men, 64 men were excluded from the study because of malignancy (*i.e.* prostate cancer), Paget's disease of bone, clinical hypogonadism, malabsorption due to gastrointestinal disorders, or their use of a drug potentially affecting bone metabolism. At the end of the enrollment, 300 men were included in the study, and 200 completed the 4-yr follow-up. Informed written consent was obtained from all participants, and the study was approved by the Institutional Review Board of Siena Medical Center. The age range of the studied men was 55–88 yr, with a mean ( $\pm$ SEM) age of  $64.8 \pm 0.8$  yr. For all subjects, a detailed medical history was obtained, and dietary calcium intake was assessed by a sequential self-questionnaire including foods that account for the majority of calcium in the diet. Body mass index (BMI) was calculated as the weight in kilograms divided by the square of the height in meters. General baseline characteristics of the population are presented in Table 1.

### Bone mass measurement

Areal BMD (aBMD; grams per square centimeter) was determined for lumbar spine (L2–L4) and proximal femur by dual-energy x-ray absorptiometry (DXA) using the Hologic 4500 instrument (Hologic, Waltham, MA) with coefficients of variation (CVs) of 0.9 and 1.9%, respectively. Broadband ultrasound attenuation (BUA), speed of sounds (SOS), and stiffness index at the os calcis were also evaluated (Achilles, Lunar, Madison, WI). The CVs were 2.5% for BUA and 0.5% for SOS. DXA and calcaneal measurements were repeated after 4 yr. Volumetric bone mineral apparent density (vBMAD; grams per cubic centimeter) was calculated from densitometric data as previously described (19), using the following formulae: femoral neck vBMAD = BMC/A<sup>2</sup>, and lumbar spine vBMAD = BMC/A<sup>3/2</sup>, where BMC is the bone mineral content and A is the projected bone area. Although the World Health Organization's definition of osteoporosis has been established only for women, for the purpose of this study, we defined osteoporosis by either a lumbar spine or femoral neck aBMD value of at least 2.5 sds below the mean for young normal white males.

Radiographs of the lumbar spine were evaluated for the presence of osteophytosis and facet joint osteoarthritis according to the methods of Orwoll *et al.* (20) and Masud *et al.* (21), respectively.

### Laboratory analysis

A 24-h urine collection and fasting serum samples obtained between 0800 and 0900 h were stored at  $-70^\circ\text{C}$  until assayed. Serum concentrations of calcium, phosphate, bone alkaline phosphatase (BALP; Tandem-R Ostase, Beckman Coulter, Inc., Fullerton, CA; interassay CV < 8.1%) and urinary type I collagen C-telopeptides [urinary crosslaps (CTX);  $\alpha$ -CrossLaps RIA, Osteometer Biotech A/S, Copenhagen, Denmark; interassay CV < 6.5%] were evaluated at baseline and after 4 yr. In addition to the above-mentioned markers of bone turnover, the following baseline hormones were evaluated: total E<sub>2</sub> (RIA, Diasorin Diagnostics, Saluggia, Italy; sensitivity, 11 pmol/liter; interassay CV < 7.9%), total T (RIA, Diasorin Diagnostics, Saluggia, Italy; sensitivity, 0.18 nmol/liter; interassay CV < 10.3%); SHBG (SHBG RIA, BIOCIDE S.A., Liege, Belgium; sensitivity, 0.8 nmol/liter; interassay CV < 8.0%), DHEAS (R-DHEA-S CTK RIA, Diasorin Diagnostics, Saluggia, Italy; sensitivity, 0.08  $\mu\text{mol/liter}$ ; interassay CV < 8.5%), LH (LH-CTK-4 RIA, Diasorin Diagnostics, Saluggia, Italy; sensitivity, 0.2 IU/liter; interassay CV < 3.7%), FSH (FSH-CTK-4 RIA, Diasorin Diagnostics, Saluggia, Italy;

**TABLE 1.** General baseline characteristics (mean  $\pm$  SD and  $\pm$ 95% CI) of the study population

|                          | Mean $\pm$ SD   | $\pm$ 95% CI |
|--------------------------|-----------------|--------------|
| Age (yr)                 | 64.8 $\pm$ 0.8  | 63.5–65.8    |
| Weight (kg)              | 74.5 $\pm$ 0.7  | 73.2–76.1    |
| Height (cm)              | 170.7 $\pm$ 0.3 | 169.8–171.6  |
| BMI (kg/m <sup>2</sup> ) | 25.6 $\pm$ 0.2  | 25.2–26.1    |
| Calcium intake (mg/d)    | 824 $\pm$ 28    | 766–876      |
| Alcohol intake (mg/d)    | 24 $\pm$ 0.5    | 23–25        |
| Current smokers (%)      | 41              |              |

CI, Confidence interval.

sensitivity, 0.2 IU/liter; interassay CV < 4.5%), IGF-I (IGF-I IRMA, Immunotech, France; sensitivity, 3 mg/ml; interassay CV < 7.4%), and 25-OH vitamin D (25-Hydroxyvitamin D <sup>125</sup>I RIA kit, Diasorin Diagnostics, Saluggia, Italy; sensitivity, 1.5 ng/ml; interassay CV < 11%). Measurements of circulating E<sub>2</sub>, T, and SHBG levels were repeated after 4 yr. The free androgen index (FAI) and free estrogen index (FEI) were calculated as the ratios between total hormone levels and SHBG. As adjunctive measures of biologically active sex hormone values, calculated free T (c-fT), non-SHBG-bound T [calculated bioavailable T (c-bioT)], calculated free E<sub>2</sub> (c-fE<sub>2</sub>), and non-SHBG-bound E<sub>2</sub> [calculated bioavailable E<sub>2</sub> (c-bioE<sub>2</sub>)] were calculated according to the method described by Vermeulen *et al.* (22) and Van den Beld *et al.* (23), taking the concentration of T, E<sub>2</sub>, and SHBG into account, and assuming a fixed albumin concentration of 45 g/liter.

### Statistical analysis

Correlations between the variables were evaluated using Pearson's simple and partial correlation coefficients. ANOVA and analysis of covariance (ANCOVA) were used to analyze the effects of sex hormone quartiles on BMD at different sites, quantitative ultrasound (QUS) parameters, rates of bone loss, and levels of bone biochemical markers. The following covariates were considered for the ANCOVA analysis: age, BMI, calcium intake, smoking status, and alcohol use. The Bonferroni pairwise multiple-comparisons test was used as *post hoc* test to evaluate the difference in bone parameters between a single quartile and each of the other quartiles. A value of  $P < 0.05$  was accepted as the value of significance. All statistical tests were two-sided and were performed by using Statistica 5.1 (Statsoft, Inc., Tulsa, OK) and SPSS software for Windows, version 10.0 (SPSS Ltd., Chicago, IL).

## Results

### Correlations of hormones with age and BMI

The correlation coefficients between baseline sex hormones and age or BMI are reported in Table 2. In the total population, T and DHEAS levels decreased with age ( $r = -0.23$ ,  $P < 0.001$ ;  $r = -0.24$ ,  $P < 0.001$ , respectively), whereas SHBG ( $r = 0.45$ ;  $P < 0.0001$ ), LH ( $r = 0.35$ ;  $P < 0.0001$ ), and FSH ( $r = 0.28$ ;  $P < 0.0001$ ) increased significantly. E<sub>2</sub> and IGF-I levels did not significantly vary by age. By contrast, the FAI and the FEI significantly decreased with age ( $r = -0.41$ ,  $P < 0.0001$ ;  $r = -0.23$ ,  $P < 0.001$ , respectively). A similar age-related decrease in c-fT ( $r = -0.40$ ;  $P < 0.0001$ ), c-bioT ( $r = -0.43$ ;  $P < 0.0001$ ), c-f E<sub>2</sub> ( $r = -0.23$ ;  $P < 0.001$ ), and c-bioE<sub>2</sub> ( $r = -0.24$ ;  $P < 0.001$ ) concentrations was observed. Circulating E<sub>2</sub> positively correlated with BMI ( $r = 0.20$ ;  $P <$

**TABLE 2.** Simple correlation coefficients between baseline hormones and age or BMI

| Hormone              | Age                | BMI                |
|----------------------|--------------------|--------------------|
| Total T              | -0.23 <sup>a</sup> | -0.12              |
| Total E <sub>2</sub> | 0.08               | 0.20 <sup>b</sup>  |
| DHEAS                | -0.24 <sup>a</sup> | 0.10               |
| SHBG                 | 0.45 <sup>c</sup>  | -0.17 <sup>d</sup> |
| IGF-I                | -0.02              | 0.06               |
| LH                   | 0.35 <sup>c</sup>  | -0.16 <sup>d</sup> |
| FSH                  | 0.28 <sup>c</sup>  | -0.15 <sup>d</sup> |
| FAI                  | -0.41 <sup>c</sup> | -0.07              |
| FEI                  | -0.23 <sup>a</sup> | 0.22 <sup>b</sup>  |
| c-fT                 | -0.40 <sup>c</sup> | -0.10              |
| c-fE <sub>2</sub>    | -0.23 <sup>a</sup> | 0.20 <sup>b</sup>  |
| c-bioT               | -0.43 <sup>c</sup> | -0.09              |
| c-bioE <sub>2</sub>  | -0.24 <sup>a</sup> | 0.22 <sup>b</sup>  |

<sup>a</sup>  $P < 0.001$ .

<sup>b</sup>  $P < 0.01$ .

<sup>c</sup>  $P < 0.0001$ .

<sup>d</sup>  $P < 0.05$ .

0.01) and total T ( $r = 0.32$ ;  $P < 0.0001$ ). The correlation between age and BMI was weak ( $r = 0.09$ ) and not statistically significant.

Results from the 4-yr longitudinal analysis confirmed the age-related decrease in serum T levels ( $-2.7\%$  per year) and the increase in SHBG levels ( $+3\%$  per year), whereas  $E_2$  concentrations after 4 yr did not significantly differ from those at baseline.

#### Correlations of sex hormones with BMD and QUS

Baseline aBMD at the femoral neck and lumbar spine were positively correlated with  $E_2$  ( $r = 0.16$ ;  $P < 0.05$ ), FEI ( $r = 0.20$ ;  $P < 0.01$ ), c- $fE_2$  ( $r = 0.16$ ;  $P < 0.01$ ), and c-bio $E_2$  ( $r = 0.20$ ;  $P < 0.01$ ) levels, but not with T, FAI, or the calculated measures of the biologically active T levels (c- $fT$  and c-bioT). Because at all sites BMD decreased with age and increased with BMI, the correlation between baseline bone mass measurements and sex hormones was adjusted for age and BMI. Adjusted aBMD at femoral sites was significantly correlated with the concentrations of  $E_2$ , FEI, c- $fE_2$ , and c-bio $E_2$ , but not with total T, FAI, c- $fT$ , or c-bioT levels (Table 3). A similar positive association between estrogen measurements and lumbar aBMD was observed in men without severe osteoarthritis (Table 3). Among QUS parameters, only SOS was positively correlated with FEI, c- $fE_2$ , c-bio $E_2$ , and  $E_2$  levels (Table 3).

To further evaluate the association between estrogen and bone mass, we compared average aBMD and QUS parameters in men grouped according to FEI quartiles (median, 2.4 pmol/nmol; lower quartile,  $<0.98$  pmol/nmol; upper quartile,  $>3.9$  pmol/nmol). At all BMD sites, men in the low FEI quartile had the lowest mean aBMD or QUS values, and those in the highest quartile had the highest mean aBMD and QUS values. This trend was statistically significant at the lumbar spine and the femoral neck (Fig. 1). Although the same trend was seen at the calcaneus, it was not statistically significant. Compared with the low FEI quartile, the mean aBMD in the highest FEI quartile were 11, 6, and 12% higher at the lumbar spine, femoral neck, and ward's triangle, respectively. The corresponding differences in vBMD were 10 and 8% at the spine and the hip, respectively (Fig. 2). When the analyses were repeated, grouping the men according to either c- $fE_2$  or c-bio  $E_2$  levels, the results were comparable with those obtained using the FEI.

#### Association of sex hormones with bone loss and bone turnover

The correlation coefficients between sex hormones and rates of change in aBMD or QUS at the calcaneus are shown on Table 4. As is evident, the decline in spinal aBMD after exclusion of subjects with severe lumbar osteoarthritis was positively correlated to FEI, c- $fE_2$ , c-bio $E_2$ , and  $E_2$  levels, but not to T, FAI, c- $fT$ , and c-bioT. Bone loss at the femoral sites was significantly correlated to FEI, c- $fE_2$ , and c-bio $E_2$  levels, but not to  $E_2$ , T, FAI, c- $fT$ , and c-bioT. The strongest correlations were seen with FEI and c-bio $E_2$  levels. A similar positive association was observed between FEI and SOS loss at the calcaneus, whereas the correlation between FEI and BUA or stiffness loss did not reach statistical significance. No correlations were found between rates of change in calcaneal ultrasound parameters and, respectively,  $E_2$ , c- $fE_2$ , c-bio  $E_2$ , T, c- $fT$ , c-bioT, or FAI levels. Serum levels of IGF-I and DHEAS did not correlate with QUS or aBMD loss at any site.

Because FEI appeared to be the most consistent predictor of rates of BMD and QUS loss, we further examined its relationship to these variables by grouping the recruited subjects according to FEI quartiles. Interestingly, men in the lower FEI quartile showed higher rates of bone loss at the lumbar spine and the femoral neck with respect to those in the higher quartiles (Fig. 3). A similar, although not significant, trend was observed for SOS but not BUA measured at

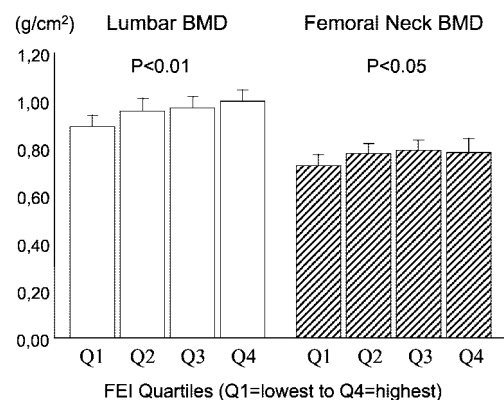

FIG. 1. Average lumbar and femoral aBMD values in elderly men by quartiles of FEI.

TABLE 3. Age and BMI adjusted partial correlation coefficients between bone mass measurements and sex steroid hormones

|                  | Total T | FAI   | c- $fT$ | c-bioT | Total $E_2$       | FEI               | c- $fE_2$         | c-bio $E_2$       |
|------------------|---------|-------|---------|--------|-------------------|-------------------|-------------------|-------------------|
| Spine without OA | -0.13   | -0.06 | 0.04    | 0.03   | 0.17 <sup>a</sup> | 0.19 <sup>b</sup> | 0.18 <sup>b</sup> | 0.19 <sup>b</sup> |
| Hip              |         |       |         |        |                   |                   |                   |                   |
| Femoral neck     | -0.09   | -0.03 | 0.09    | 0.10   | 0.16 <sup>a</sup> | 0.20 <sup>b</sup> | 0.18 <sup>b</sup> | 0.19 <sup>b</sup> |
| Trochanter       | -0.12   | 0.02  | -0.03   | 0.04   | 0.15 <sup>a</sup> | 0.24 <sup>c</sup> | 0.22 <sup>b</sup> | 0.23 <sup>c</sup> |
| Total hip        | -0.13   | 0.02  | 0.09    | 0.11   | 0.15 <sup>a</sup> | 0.27 <sup>d</sup> | 0.24 <sup>c</sup> | 0.25 <sup>c</sup> |
| Ward's triangle  | -0.07   | 0.04  | 0.03    | 0.05   | 0.09              | 0.22 <sup>b</sup> | 0.19 <sup>b</sup> | 0.21 <sup>b</sup> |
| Calcaneus        |         |       |         |        |                   |                   |                   |                   |
| BUA              | -0.04   | 0.06  | 0.03    | 0.04   | 0.05              | 0.06              | 0.04              | 0.07              |
| SOS              | 0.02    | -0.01 | 0.06    | 0.08   | 0.14 <sup>a</sup> | 0.15 <sup>a</sup> | 0.14 <sup>a</sup> | 0.14 <sup>a</sup> |
| Stiffness        | -0.01   | 0.08  | 0.04    | 0.05   | 0.10              | 0.10              | 0.09              | 0.10              |

OA, Osteoarthritis.

<sup>a</sup>  $P < 0.05$ .

<sup>b</sup>  $P < 0.01$ .

<sup>c</sup>  $P < 0.001$ .

<sup>d</sup>  $P < 0.0001$ .

the calcaneus. As shown in Fig. 3, no significant differences in aBMD loss were observed between subjects grouped in the two lower quartiles of FEI (Q1 and Q2, below the median) as well as between those men in the upper two quartiles (Q3 and Q4, above the median), suggesting the possibility of a threshold level of FEI corresponding approximately to the median value. Similar but less significant results were obtained when total E<sub>2</sub>, c-fE<sub>2</sub>, and c-bioE<sub>2</sub> levels were considered. By contrast, no statistically significant differences were observed when subjects were ranked according to T, FAI, c-fT, or c-bioT quartiles.

Consistent with the results on rates of bone loss, we observed a negative correlation between FEI levels and urinary CTX or serum BALP ( $r = -0.17, P < 0.05$ ;  $r = -0.19, P < 0.01$ , respectively). Moreover, men with FEI in the lower quartile showed increased urinary CTX levels compared with those of men with FEI in the upper two quartiles (Fig. 4A). Similarly, BALP levels were significantly higher and increased significantly after 4 yr in men with FEI in the lower quartile with respect to men with the FEI in the higher quartile (Fig. 4B). Comparable results were obtained when analyses were performed considering total E<sub>2</sub>, c-fE<sub>2</sub>, and c-bioE<sub>2</sub> levels.

Sex hormone levels in osteoporotic vs. nonosteoporotic males

Of the 200 men, 66 (33%) were osteoporotic according to the  $-2.5$  sd cutoff value at either the lumbar spine and/or the femoral neck. Clinical characteristics of osteoporotic and nonosteoporotic subjects are shown on Table 5. Age and height did not significantly differ between the two groups,

whereas the weight and the average daily intake of calcium were higher in nonosteoporotic compared with osteoporotic subjects. Of interest, the FEI and the c-bioE<sub>2</sub> were significantly lower in osteoporotic subjects with respect to nonosteoporotic subjects. A similar, although not significant, trend was observed for E<sub>2</sub> and c-fE<sub>2</sub> levels, whereas T, c-fT, c-bioT, and SHBG were slightly but not significantly higher in the osteoporotic group. Moreover, the ratio between E<sub>2</sub> and T, an indirect measure for aromatase activity was significantly lower in osteoporotic than in normal subjects. Notably, a significant age-related increase in this ratio was also observed ( $r = 0.19$ ;  $P < 0.01$ ), suggesting that the ability to aromatize androgens into estrogen may be enhanced with aging. The difference in the E<sub>2</sub>/T ratio between osteoporotic and nonosteoporotic men remained statistically significant after adjusting for BMI or body weight ( $P < 0.05$ , ANCOVA).

Discussion

Sex steroid hormones are important regulators of bone physiology and marked alteration in their levels represent a major factor in the pathogenesis of osteoporosis. Although the importance of estrogen in maintaining bone mass in women is firmly established (24), the relative contributions of estrogen *vs.* androgens in regulating male skeletal homeostasis remain unclear. Androgens are the dominant sex steroids secreted in males and have long been assumed to be critical for skeletal maintenance in men (25). However, in the past few years, several clinical and experimental observations indicated a major and likely dominant role of estrogens in the regulation of bone mineralization in the male, sug-

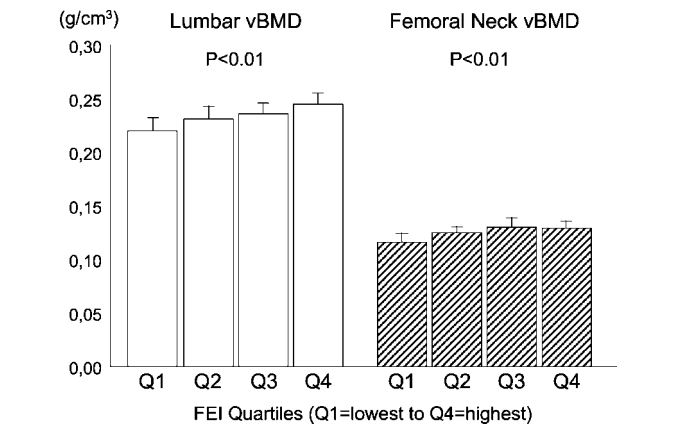

FIG. 2. Average lumbar and femoral vBMD values in elderly men by quartiles of FEI.

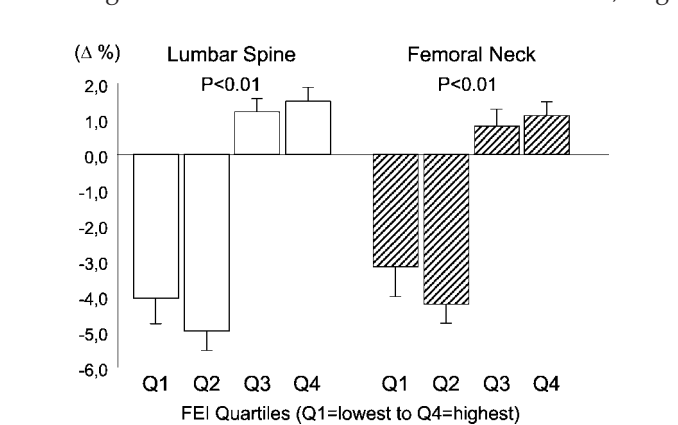

FIG. 3. Rates of aBMD loss (percentage per 4 yr) in elderly men grouped according to FEI quartiles.

TABLE 4. Simple correlation coefficients between baseline hormones and rates of bone loss

|                          | Total T | FAI   | c-fT  | c-bioT | Total E <sub>2</sub> | FEI               | c-fE <sub>2</sub> | c-bioE <sub>2</sub> |
|--------------------------|---------|-------|-------|--------|----------------------|-------------------|-------------------|---------------------|
| LS-BMD loss <sup>a</sup> | 0.11    | 0.10  | 0.11  | 0.12   | 0.20 <sup>b</sup>    | 0.24 <sup>c</sup> | 0.19 <sup>b</sup> | 0.24 <sup>c</sup>   |
| FN-BMD loss              | -0.09   | -0.05 | 0.02  | 0.07   | 0.13                 | 0.16 <sup>d</sup> | 0.14 <sup>d</sup> | 0.17 <sup>d</sup>   |
| WT-BMD loss              | -0.13   | -0.05 | -0.08 | -0.06  | 0.13                 | 0.14 <sup>d</sup> | 0.12              | 0.14 <sup>d</sup>   |
| SOS loss                 | -0.04   | -0.02 | -0.03 | -0.02  | 0.10                 | 0.16 <sup>d</sup> | 0.12              | 0.13                |
| BUA loss                 | -0.06   | -0.10 | -0.06 | -0.04  | 0.06                 | 0.12              | 0.09              | 0.10                |
| Stiffness loss           | -0.05   | -0.08 | -0.04 | -0.03  | 0.10                 | 0.13              | 0.10              | 0.12                |

LS, Lumbar spine; FN, femoral neck; WT, Ward's triangle.  
<sup>a</sup> Subjects with severe lumbar osteoarthritis were excluded from analysis.  
<sup>b</sup>  $P < 0.01$ .  
<sup>c</sup>  $P < 0.001$ .  
<sup>d</sup>  $P < 0.05$ .



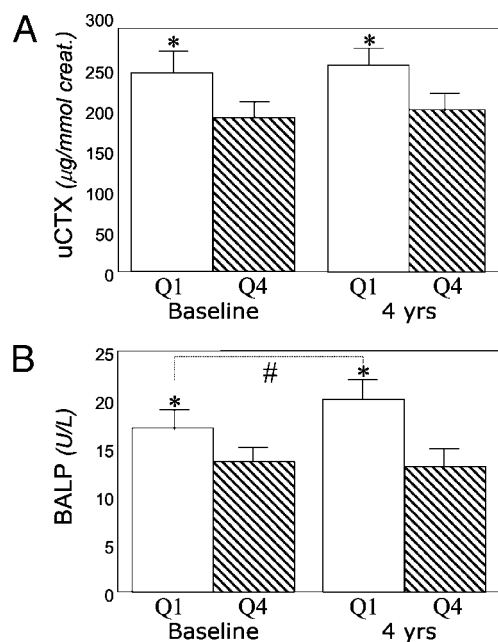

FIG. 4. Bone turnover markers at baseline and after 4 yr in subjects in the low (Q1) vs. high (Q4) FEI quartiles. A, uCTX, urinary  $\alpha$ -CTX (\*,  $P < 0.05$ , Q1 vs. Q4). B, BALP (\*,  $P < 0.05$ , Q1 vs. Q4; #,  $P < 0.05$ , baseline BALP vs. 4-yr BALP).

gesting that the skeletal effects of T are, at least in part, mediated by its aromatization into  $E_2$  (11). Unfused epiphyses, higher rates of bone loss, and severe osteoporosis were described in a young men with an inactivating mutation in the estrogen receptor- $\alpha$  gene (26) as well as in males with homozygous mutations in the aromatase gene (27–30). A similar, albeit less striking, osteopenic phenotype was noted in mouse knockout models of either the estrogen receptor- $\alpha$  and aromatase genes (31–34). Taken together, these observations clearly demonstrated that estrogen is necessary for the acquisition of peak BMD and the consolidation of growth cartilages in young men, but its role in regulating bone loss in elderly men is not as clear. Although cross-sectional studies in aged males suggested a correlation of circulating estrogens with bone mass and bone turnover (12–17), evidence from longitudinal studies is confined to a single observation showing a positive association between bioavailable  $E_2$  levels and rates of bone loss at the forearm (18). Indeed, in a previous study, Slemenda *et al.* (12) examined the role of sex steroids on bone mass in a group of elderly men followed longitudinally for an average of 2.1 yr. However, as pointed out by the authors, the study addressed bone loss only in a preliminary manner because of the relatively short period of follow-up (12). Due to the greater noise/signal ratio in rates of bone loss in that relatively short period, the longitudinal analysis was limited to the comparison of men losing bone density at more than 1% per year vs. those losing BMD at less than 1% per year and suggested a significant role of estrogen in maintaining bone mass. The data presented here confirm and extend these findings, indicating estrogen as the main steroid regulating bone loss at multiple skeletal sites in elderly men.

Consistent with previous observations (6, 7, 13), in our

TABLE 5. Clinical characteristics and hormone levels (mean  $\pm$  SEM) in osteoporotic and nonosteoporotic men

| Characteristic             | Osteoporotics (n = 66) | Nonosteoporotics (n = 134)     |
|----------------------------|------------------------|--------------------------------|
| Age (yr)                   | 63.4 $\pm$ 1.3         | 65.5 $\pm$ 0.7                 |
| Weight (kg)                | 70.7 $\pm$ 1.1         | 76.5 $\pm$ 0.9 <sup>a</sup>    |
| Height (cm)                | 170.4 $\pm$ 0.9        | 170.9 $\pm$ 0.5                |
| BMI (kg/m <sup>2</sup> )   | 24.4 $\pm$ 0.4         | 26.2 $\pm$ 0.3 <sup>a</sup>    |
| $E_2$ (pmol/liter)         | 96.5 $\pm$ 5.5         | 108.9 $\pm$ 4.0                |
| T (nmol/liter)             | 15.0 $\pm$ 0.9         | 14.0 $\pm$ 0.5                 |
| DHEAS ( $\mu$ g/ml)        | 0.467 $\pm$ 0.05       | 0.470 $\pm$ 0.04               |
| SHBG (nmol/liter)          | 42.4 $\pm$ 2.9         | 39.5 $\pm$ 1.8                 |
| IGF-I (ng/ml)              | 123.4 $\pm$ 16         | 126.6 $\pm$ 6                  |
| 25-OH Vitamin D (ng/ml)    | 25.07 $\pm$ 1.2        | 26.5 $\pm$ 0.9                 |
| FEI (pmol/nmol)            | 2.71 $\pm$ 0.2         | 3.10 $\pm$ 0.1 <sup>b</sup>    |
| FAI (nmol/nmol)            | 0.450 $\pm$ 0.05       | 0.431 $\pm$ 0.02               |
| c-fT (nmol/liter)          | 0.234 $\pm$ 0.02       | 0.226 $\pm$ 0.02               |
| c-f $E_2$ (pmol/liter)     | 2.41 $\pm$ 0.13        | 2.5 $\pm$ 0.09                 |
| c-bioT (nmol/liter)        | 6.2 $\pm$ 0.5          | 6.0 $\pm$ 0.3                  |
| c-bio $E_2$ (nmol/liter)   | 0.072 $\pm$ 0.004      | 0.088 $\pm$ 0.003 <sup>b</sup> |
| $E_2$ /T ratio (pmol/nmol) | 7.05 $\pm$ 0.5         | 8.50 $\pm$ 0.3 <sup>a</sup>    |

<sup>a</sup>  $P < 0.01$ , ANOVA nonosteoporotics vs. osteoporotics.

<sup>b</sup>  $P < 0.05$ , ANOVA nonosteoporotics vs. osteoporotics.

cohort, the concentrations of total T, DHEAS, FEI, and FAI, as well as all of the calculated measures of the biologically active sex hormone levels decreased significantly with age, whereas those of total  $E_2$  remained stable. The decrease of FEI and c-bio $E_2$ , as index of the biologically active fraction of  $E_2$ , may result from the increase in SHBG and the decrease in bioavailable androgens, which are a substrate for peripheral aromatization. Interestingly, FEI, c-f  $E_2$ , and c-bio $E_2$  concentrations were higher among men losing bone mass at slower rates. Subjects with bioavailable estrogen measures in the lowest quartile showed lower baseline BMD and QUS values and higher rates of bone loss at the lumbar spine and the femoral neck compared with those men in the highest quartile. Importantly, weak differences in bone loss were observed between subjects grouped in the two lower quartiles as well as between those men in the upper two quartiles, suggesting the possibility of a threshold level of bioavailable estrogen to suppress bone resorption, corresponding approximately to the median value (FEI, 2.4 pmol/nmol). This observation is consistent with the results of the previous longitudinal study by Khosla *et al.* (18) showing that elderly men with a measured bioavailable  $E_2$  level of less than 40 pmol/liter (which corresponds to a total  $E_2$  level of 114 pmol/liter) are at greatest risk for increases in bone resorption and bone loss, whereas men with bioavailable  $E_2$  levels above that value are relatively protected against bone loss. On the basis of the average SHBG levels in our population, the estimated total  $E_2$  level required to achieve a FEI level of 2.4 pmol/nmol was 98 pmol/liter, which is quite similar to the threshold value reported by Khosla *et al.*, given the different assay methods used. Together with the findings of a recent cross-sectional study (13) showing significantly lower BMD at multiple sites in men in the lowest quartile for bioavailable  $E_2$  levels (<53 pmol/liter) compared with men in the upper three quartiles, these results are consistent with the hypothesis of a threshold level of non-SHBG-bound  $E_2$  for skeletal sufficiency in the elderly male.

We also found an inverse association between bioavailable

estrogen levels and urinary CTX, in keeping with evidence from some recent interventional studies that directly tested the relative contributions of estrogen *vs.* androgens in preventing the increase in bone resorption after the induction of hypogonadism and aromatase inhibition (35–37). Subjects in the lower FEI quartiles showed increased urinary CTX levels with respect to those in the upper quartile. Thus, estrogen appears to play a dominant role in regulating bone resorption in elderly men. The observed parallel increase in BALP among subjects in the lower FEI quartile may reflect the increase in bone turnover.

Of interest, our finding of lower FEI and c-bioE<sub>2</sub> concentrations levels in the group of subjects with osteoporosis, compared with those with normal BMD values, provides additional evidence for the importance of estrogen in regulating bone metabolism in elderly males. Notably, we also observed a lower E<sub>2</sub>/T ratio in osteoporotic than in nonosteoporotic men, suggesting an impairment of aromatase activity as a possible etiopathogenetic factor for osteoporosis in elderly men. Indeed, a likely explanation for the higher E<sub>2</sub>/T ratio observed in nonosteoporotic subjects could be linked to the higher BMI of these subjects and thus to an increased aromatization of androgens into estrogen by adipose tissue. However, the difference in E<sub>2</sub>/T ratio between osteoporotic and nonosteoporotic men remained statistically significant after adjusting for BMI or body weight, indicating an additive influence on peripheral aromatase activity, independent from the amount of body fat. Of interest, both aromatase activity and amounts of aromatase mRNA in bone have been shown to vary widely among subjects (38, 39), and this variation could indicate a genetic component. These findings are consistent with our preliminary observation of genetically determined differences in aromatase activity due to a TTTA repeat polymorphism in the CYP19 aromatase gene (40). Male subjects with a high CYP19 TTTA repeat genotype showed a more efficient aromatase activity both *in vivo* and *in vitro*, with higher estrogen production that was protective for bone loss, particularly at trabecular sites (40, 41). These individual differences in aromatase efficiency may be a more important determinant than the circulating androgen level of whether a man will become osteoporotic and may explain the lack of correlation between bone loss and T levels. By contrast, the observed correlation between bone loss and circulating bioavailable and total estrogen levels also suggest that, although local aromatization of androgens to estrogen in bone cells may contribute significantly to skeletal homeostasis (42), a minimum circulating level of E<sub>2</sub> derived from peripheral nonskeletal aromatization is necessary to prevent bone loss.

Our study has some important limitations. First, the calculated bioavailable indexes of either T or E<sub>2</sub> concentrations are indirect measurements for free bioavailable estrogen and androgens, although widely used and validated in previous studies (22, 23). Moreover, results from a previous longitudinal observation showed a similar correlation of FEI and measured bioavailable E<sub>2</sub> with bone turnover and bone loss (18). Thus, for the purpose of the present study, FEI as well as c-bioE<sub>2</sub> concentrations may be considered as a reasonable surrogate for bioavailable E<sub>2</sub>. Second, because the results obtained from DXA are a combination of effects on trabecular

and cortical bone and express aBMD, but not volumetric BMD, the present study did not allow exploration of the supposed role of androgens in regulating periosteal apposition and bone size (25). Peripheral-quantitative computed tomography or histomorphometric studies should be required to address this issue and to better define the direct role of androgens on bone. Finally, the proportion of men with osteoporosis in our population was higher than expected and could indicate a disease-based selection bias, with the osteoporotic men responding at a higher rate than healthy men (the average  $\pm$  SD T scores were  $-1.6 \pm 1.0$  and  $-1.4 \pm 1.3$  at the femoral neck and the lumbar spine, respectively). Moreover, 200 of the 300 recruited subjects completed the 4-yr follow-up. The analysis of the baseline DXA scan of the 100 drop-out subjects showed the presence of osteoporosis only in 3 (3%), with the remaining 97 men being nonosteoporotic. Thus, the men who were osteoporotic at the baseline visit were more interested in continuing the follow-up examinations than those who were nonosteoporotic. When we considered all of the 300 recruited men, the proportion of osteoporotic subjects was lower. An additive explanation for the higher proportion of osteoporotic men is represented by the low physical activity and by the relatively low calcium intake (800 mg/d *vs.* the recommended optimal intake of 1000 mg/d) of the recruited population.

In conclusion, results from the present study show that FEI and c-bioE<sub>2</sub> concentrations, as indirect measures for bioavailable E<sub>2</sub>, are the most consistent predictor of bone turnover and bone loss in elderly men and suggest that peripheral aromatization of T into E<sub>2</sub> plays a significant role in the regulation of bone metabolism in elderly males. Further studies are needed on the diagnostic and potentially therapeutic role of estrogen on bone metabolism and fracture incidence in men.

### Acknowledgments

Received April 25, 2003. Accepted August 12, 2003.

Address all correspondence and requests for reprints to: Luigi Gennari, M.D., Ph.D., Department of Internal Medicine, Endocrine-Metabolic Sciences and Biochemistry, University of Siena, Viale Bracci 1, 53100 Siena, Italy. E-mail: gennari@unisi.it.

This work was supported by grants from Ministero dell'Università e della Ricerca Scientifica e Tecnologica (60 and 40%) and the National Health System Projects (to C.G. and R.N.) and by International Osteoporosis Foundation-Servier Young Investigator Award (to L.G.).

### References

1. Bilezikian JP 1999 Osteoporosis in men. *J Clin Endocrinol Metab* 84:3431–3434
2. Jones G, Nguyen T, Sambrook PN, Kelly PJ, Gilbert C, Eisman JA 1994 Symptomatic fracture incidence in elderly men and women: the Dubbo Osteoporosis Epidemiology Study (DOES). *Osteoporos Int* 4:277–282
3. Seeman E 2001 Unresolved issues in osteoporosis in men. *Rev Endocr Metab Disord* 2:45–64
4. Gulberg B, Johnell O, Kanis JA 1997 World-wide projections for hip fracture. *Osteoporos Int* 7:407–413
5. Center JR, Nguyen TV, Schneider D, Sambrook PN, Eisman JA 1999 Mortality after all major types of osteoporotic fracture: an observational study. *Lancet* 353:878–882
6. Harman SM, Metter EJ, Tobin JD, Pearson J, Blackman MR 2001 Longitudinal effects of aging on serum total and free testosterone levels in healthy men. *J Clin Endocrinol Metab* 86:724–731
7. Gray A, Feldman HA, McInlay JB, Longcope C 1991 Age, disease, and changing sex hormone levels in middle-aged men: results of the Massachusetts male aging study. *J Clin Endocrinol Metab* 73:1016–1025
8. Nicolas V, Prewett A, Bettica P, Mohan S, Finkelman RD, Baylink DJ, Farley

- JR 1994 Age-related decreases in insulin-like growth factor-1 and transforming growth factor- $\beta$  in femoral cortical bone from both men and women: implications for bone loss with aging. *J Clin Endocrinol Metab* 78:1011–1016
9. Center JR, Nguyen TV, Sambrook PN, Eisman JA 1999 Hormonal and biochemical parameters in the determination of osteoporosis in elderly men. *J Clin Endocrinol Metab* 84:3626–3635
10. Martinez Diaz-Guerra G, Hawkins F, Rapado A, Ruiz Diaz MA, Diaz-Curiel M 2001 Hormonal and anthropometric predictors of bone mass in healthy elderly men: major effect of sex hormone binding globulin, parathyroid hormone and body weight. *Osteoporos Int* 12:178–184
11. Khosla S, Melton III LJ, Riggs BL 2002 Estrogen and the male skeleton. *J Clin Endocrinol Metab* 87:1443–1450
12. Slemenda CW, Longcope C, Zhou L, Hui SL, Peacock M, Johnston CC 1997 Sex steroids and bone mass in older men: positive associations with serum estrogens and negative associations with androgens. *J Clin Invest* 100:1755–1759
13. Szulc P, Munoz B, Claustrat B, Garnero P, Marchand F, Duboeuf F, Delmas PD 2001 Bioavailable estradiol may be an important determinant of osteoporosis in men. The MINOS Study. *J Clin Endocrinol Metab* 86:192–199
14. Greendale GA, Edelstein S, Barrett-Connor E 1997 Endogenous sex steroids and bone mineral density in older women and men: the Rancho Bernardo Study. *J Bone Miner Res* 12:1833–1843
15. Khosla S, Melton III LJ, Atkinson EJ, O'Fallon WM, Klee GG, Riggs BL 1998 Relationship of serum sex steroid levels and bone turnover markers with bone mineral density in men and women: a key role for bioavailable estrogen. *J Clin Endocrinol Metab* 83:2266–2274
16. Ongphiphadhanakul B, Rajatanavin R, Chanprasertyothin S, Piaseu N, Chailurkit L 1998 Serum estradiol and oestrogen-receptor gene polymorphism are associated with bone mineral density independently of serum testosterone in normal males. *Clin Endocrinol* 49:803–809
17. Amin S, Zhang Y, Sawin CT, Evans SR, Hannan MT, Kiel DP, Wilson PW, Felson DT 2000 Association of hypogonadism and estradiol levels with bone mineral density in elderly men from the Framingham study. *Ann Intern Med* 133:951–963
18. Khosla S, Melton III LJ, Atkinson EJ, O'Fallon WM 2001 Relationship of serum sex steroid levels to longitudinal changes in bone density in young versus elderly men. *J Clin Endocrinol Metab* 86:3555–3561
19. Katzman DK, Bachrach LK, Carter DR, Marcus R 1991 Clinical and anthropometric correlates of bone mineral acquisition in healthy adolescent girls. *J Clin Endocrinol Metab* 73:1332–1339
20. Orwoll ES, Oviatt SK, Mann T 1990 The impact of osteophytic and vascular calcifications on vertebral mineral density measurements in men. *J Clin Endocrinol Metab* 70:1202–1207
21. Masud T, Keen R, Nandra D, Jawed S, Doyle DV, Spector TD 1996 Facet joint osteoarthritis and bone density measurements. In: Papoulos SE, Lips P, Pols HAP, Johnston CC, Delmas PD, eds. *Osteoporosis*. Amsterdam: Elsevier Science; 167–170
22. Vermeulen A, Verdonck L, Kaufman JM 1999 A critical evaluation of simple methods for the estimation of free testosterone in serum. *J Clin Endocrinol Metab* 84:3666–3672
23. Van den Beld AW, de Jong FH, Grobbee DE, Pols HA, Lamberts SW 2000 Measures of bioavailable serum testosterone and estradiol and their relationships with muscle strength, bone density, and body composition in elderly men. *J Clin Endocrinol Metab* 85:3276–3282
24. Richelson LS, Wahner HW, Melton III LJ, Riggs BL 1984 Relative contributions of aging and estrogen deficiency to postmenopausal bone loss. *N Engl J Med* 311:1273–1275
25. Hofbauer LC, Khosla S 1999 Androgen effects on bone metabolism: recent progress and controversies. *Eur J Endocrinol* 140:271–286
26. Smith EP, Boyd J, Frank JR, Takahashi H, Cohen RM, Specker B, Williams TC, Lubahn DB, Korach KS 1994 Estrogen resistance caused by a mutation in the estrogen receptor gene in a man. *N Engl J Med* 331:1056–1061
27. Morishima A, Grumbach MM, Simpson ER, Fisher C, Qin K 1995 Aromatase deficiency in male and female siblings caused by a novel mutation and the physiological role of estrogens. *J Clin Endocrinol Metab* 80:3689–3698
28. Carani C, Qin K, Simoni M, Faustini-Fustini M, Serpente S, Boyd J, Korach KS, Simpson ER 1997 Effect of testosterone and estradiol in a man with aromatase deficiency. *N Engl J Med* 337:91–95
29. Bilezikian JP, Morishima A, Bell J, Grumbach MM 1998 Increased bone mass as a result of estrogen therapy in a man with aromatase deficiency. *N Engl J Med* 339:599–603
30. Herrmann BL, Saller B, Janssen OE, Gocke P, Bockisch A, Sperling H, Mann K, Broecker M 2002 Impact of estrogen replacement therapy in a male with congenital aromatase deficiency caused by a novel mutation in the CYP19 gene. *J Clin Endocrinol Metab* 87:5476–5484
31. Couse JF, Korach KS 1999 Estrogen receptor null mice: what have we learned and where will they lead us? *Endocr Rev* 20:358–417
32. Vidal O, Lindberg MK, Hollberg K, Baylink DJ, Andersson G, Lubahn DB, Mohan S, Gustafsson J, Ohlsson C 2000 Estrogen receptor specificity in the regulation of skeletal growth and maturation in male mice. *Proc Natl Acad Sci USA* 97:5474–5479
33. Miyaura C, Toda K, Inada M, Ohshima T, Matsumoto C, Okada T, Ito M, Shizuta Y, Ito A 2001 Sex- and age-related response to aromatase deficiency in bone. *Biochem Biophys Res Commun* 280:1062–1068
34. Oz OK, Hirasawa G, Lawson J, Nanu L, Constantinescu A, Antich PP, Mason RP, Tsyganov E, Parkey RW, Zerwekh JE, Simpson ER 2001 Bone phenotype of the aromatase deficient mouse. *J Steroid Biochem Mol Biol* 79:49–59
35. Falahati-Nini A, Riggs BL, Atkinson EJ, O'Fallon WM, Eastell R, Khosla S 2000 Relative contributions of testosterone and estrogen in regulating bone resorption and formation in normal elderly men. *J Clin Invest* 106:1553–1560
36. Leder BZ, LeBlanc KM, Schoenfeld DA, Eastell R, Finkelstein JS 2003 Differential effects of androgens and estrogens on bone turnover in normal men. *J Clin Endocrinol Metab* 88:204–210
37. Taxel P, Kennedy DG, Fall PM, Willard AK, Clive JM, Raisz LG 2001 The effect of aromatase inhibition on sex steroids, gonadotropins, and markers of bone turnover in older men. *J Clin Endocrinol Metab* 86:2869–2874
38. Sasano H, Uzuki M, Sawai T, Nagura H, Matsunaga G, Kashimoto O, Harada N 1997 Aromatase in human bone tissue. *J Bone Miner Res* 12:1416–1423
39. Schweikert H-U, Wolf L, Romalo G 1995 Oestrogen formation from androstenedione in human bone. *Clin Endocrinol* 43:37–42
40. Gennari L, Becherini L, Gonnelli S, Masi L, Montagnani A, Bargagli G, Mangeri M, Franci B, Tanini A, Brandi ML, Gennari C 2000 Hormonal and genetic determinants of bone loss in aged men: evidence of a major role of aromatase gene polymorphism. *J Bone Miner Res* 15(Suppl 1):s163 (Abstract)
41. Masi L, Picariello L, Becherini L, Fiorelli G, Gennari L, Falchetti A, Brandi ML 2001 Estrogen production by fibroblast of postmenopausal women with various aromatase genotypes. *Calcif Tissue Int* 67:485 (Abstract)
42. Simpson E, Rubin G, Clyne C, Robertson K, O'Donnell L, Jones M, Davis S 2000 The role of local estrogen biosynthesis in males and females. *Trends Endocrinol Metab* 11:184–188
